# Supplementary material for: Chiral oxovanadium complex catalyzed enantioselective oxidative coupling of 2-naphthols
Source: Royal Society of Chemistry journal article supplement (doi:10.1039/b101670i), 2001-01-01

# Supplementary information

HPLC analysis were performed on HITACHI L-6200 pump with L-4200 UV detector and D-2500 integrator. Kromasil 100-5CHI-DMB column were purchased from Eka Chemicals AB, Separation Products, SE-445 80 Bohus, Sweden. Tel +46 31 58 70 00 Fax +46 31 58 77 27.


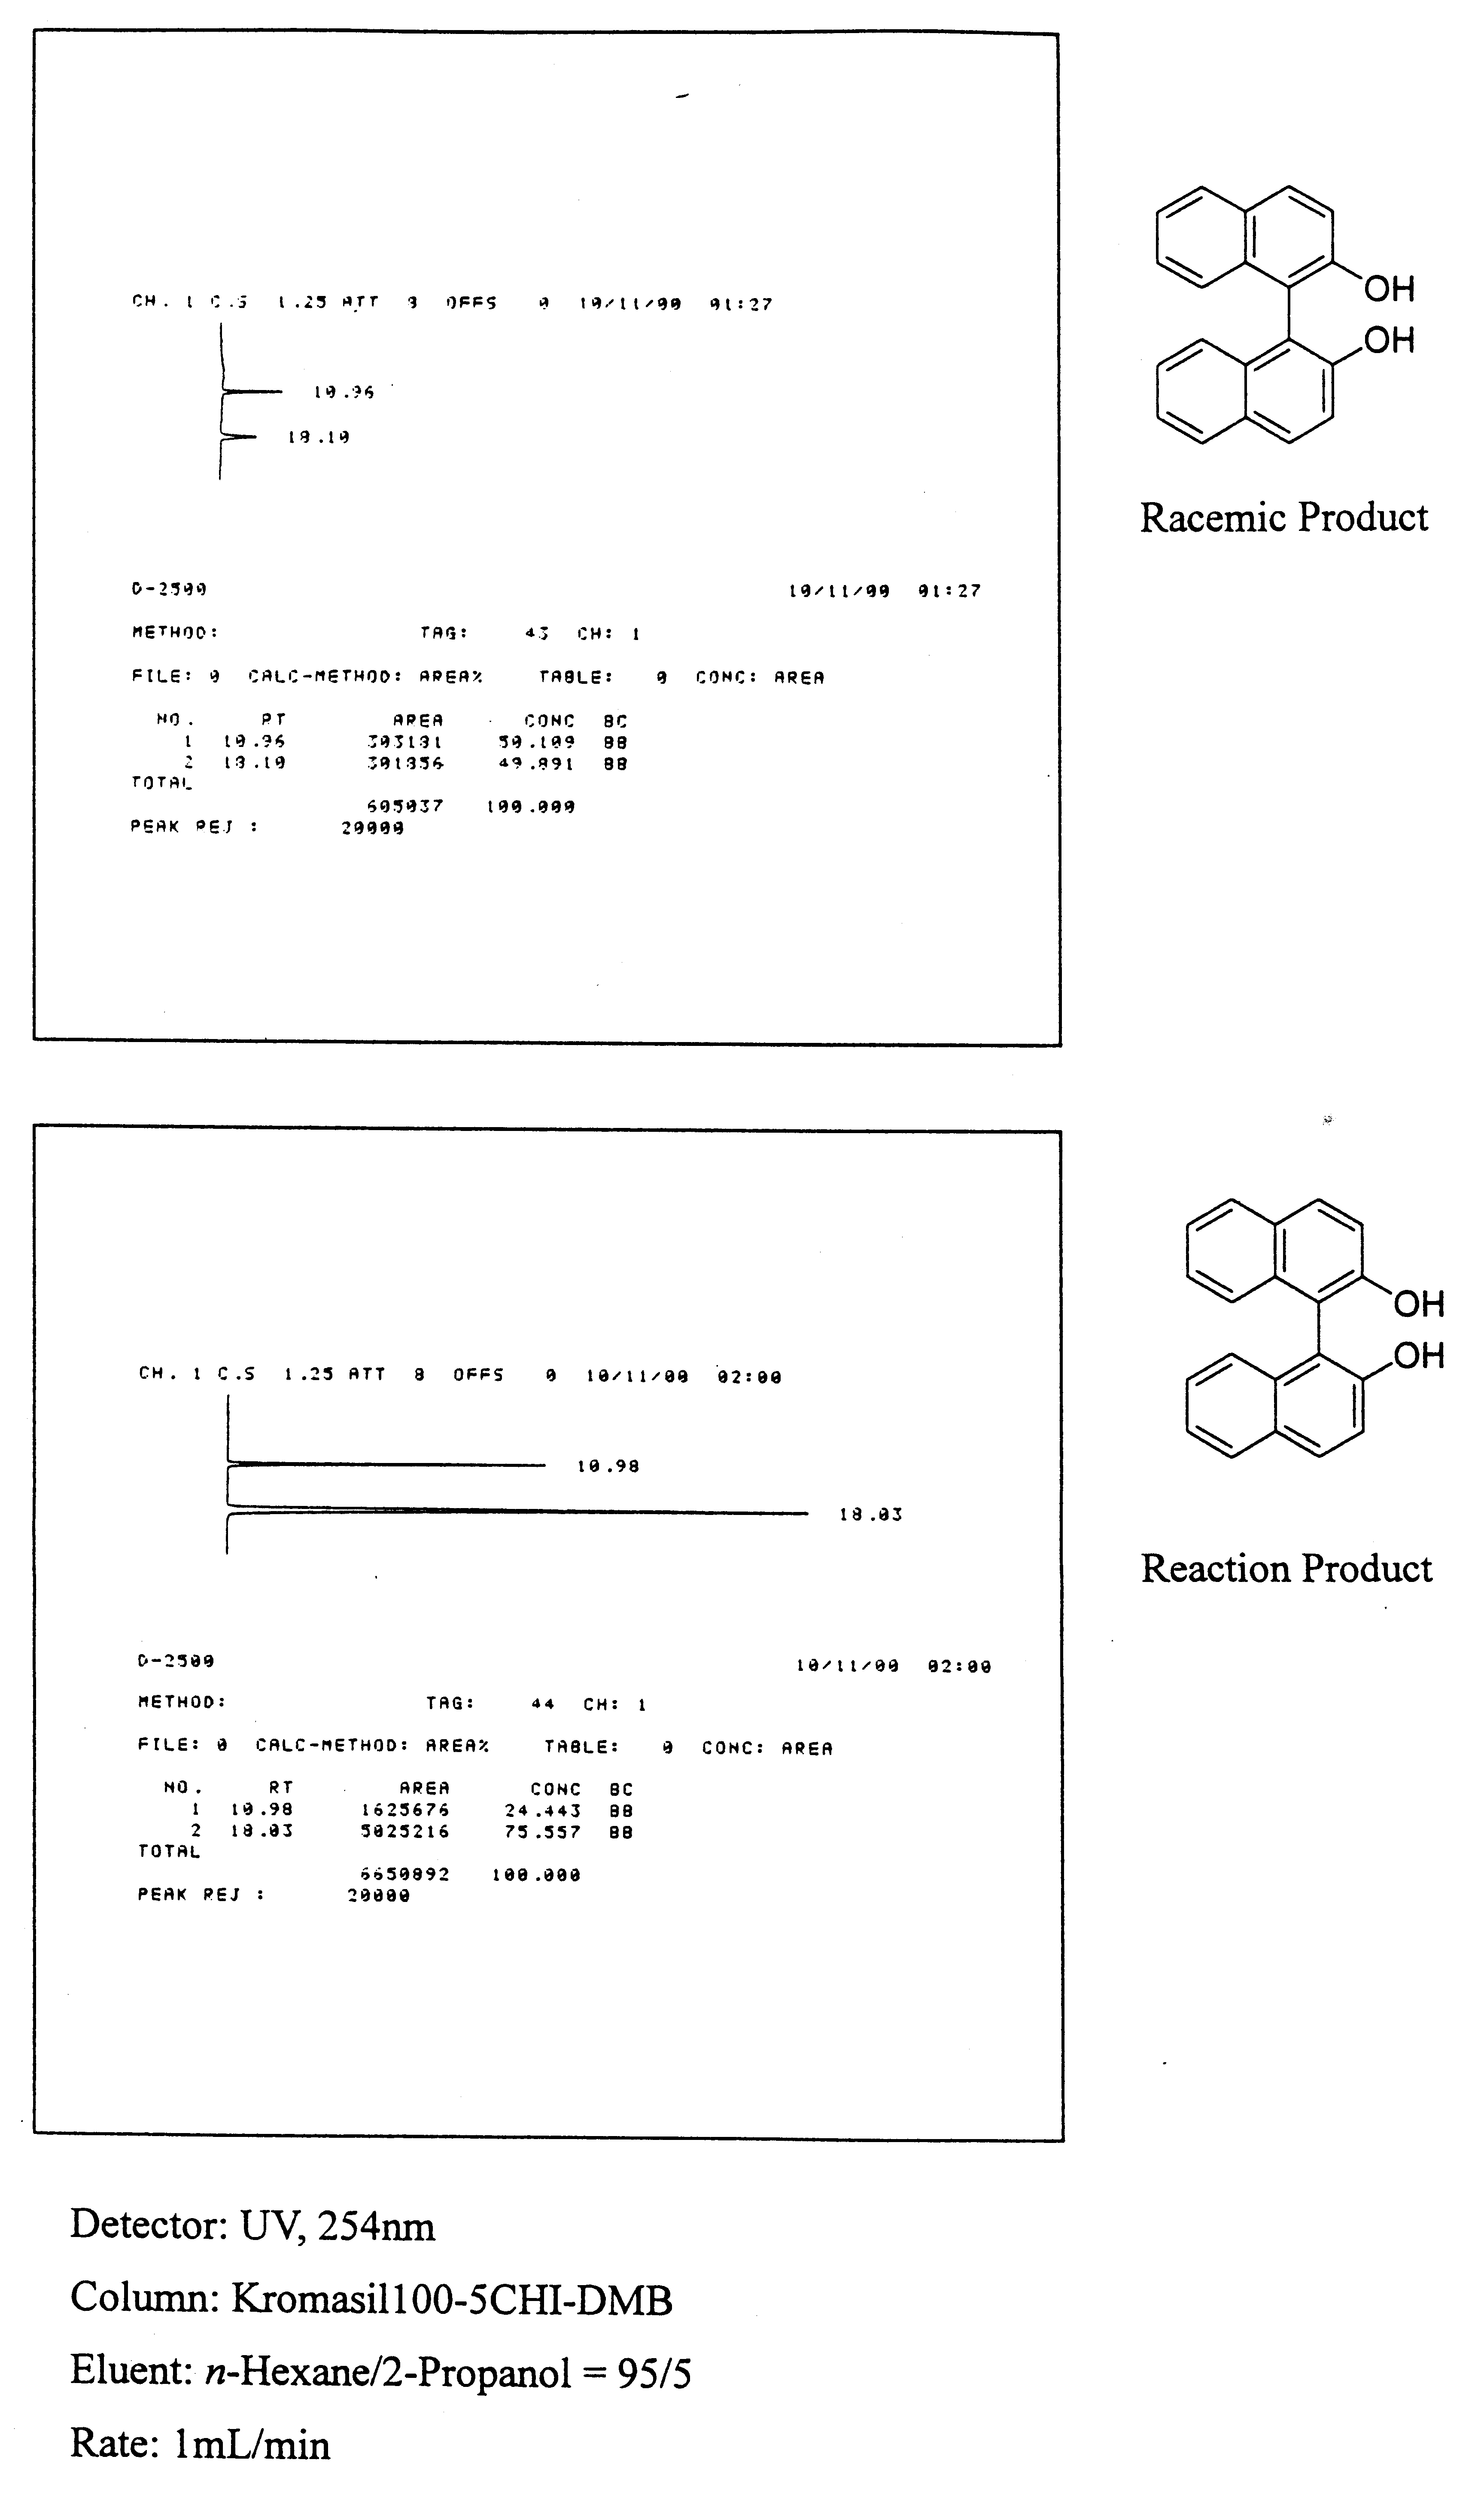


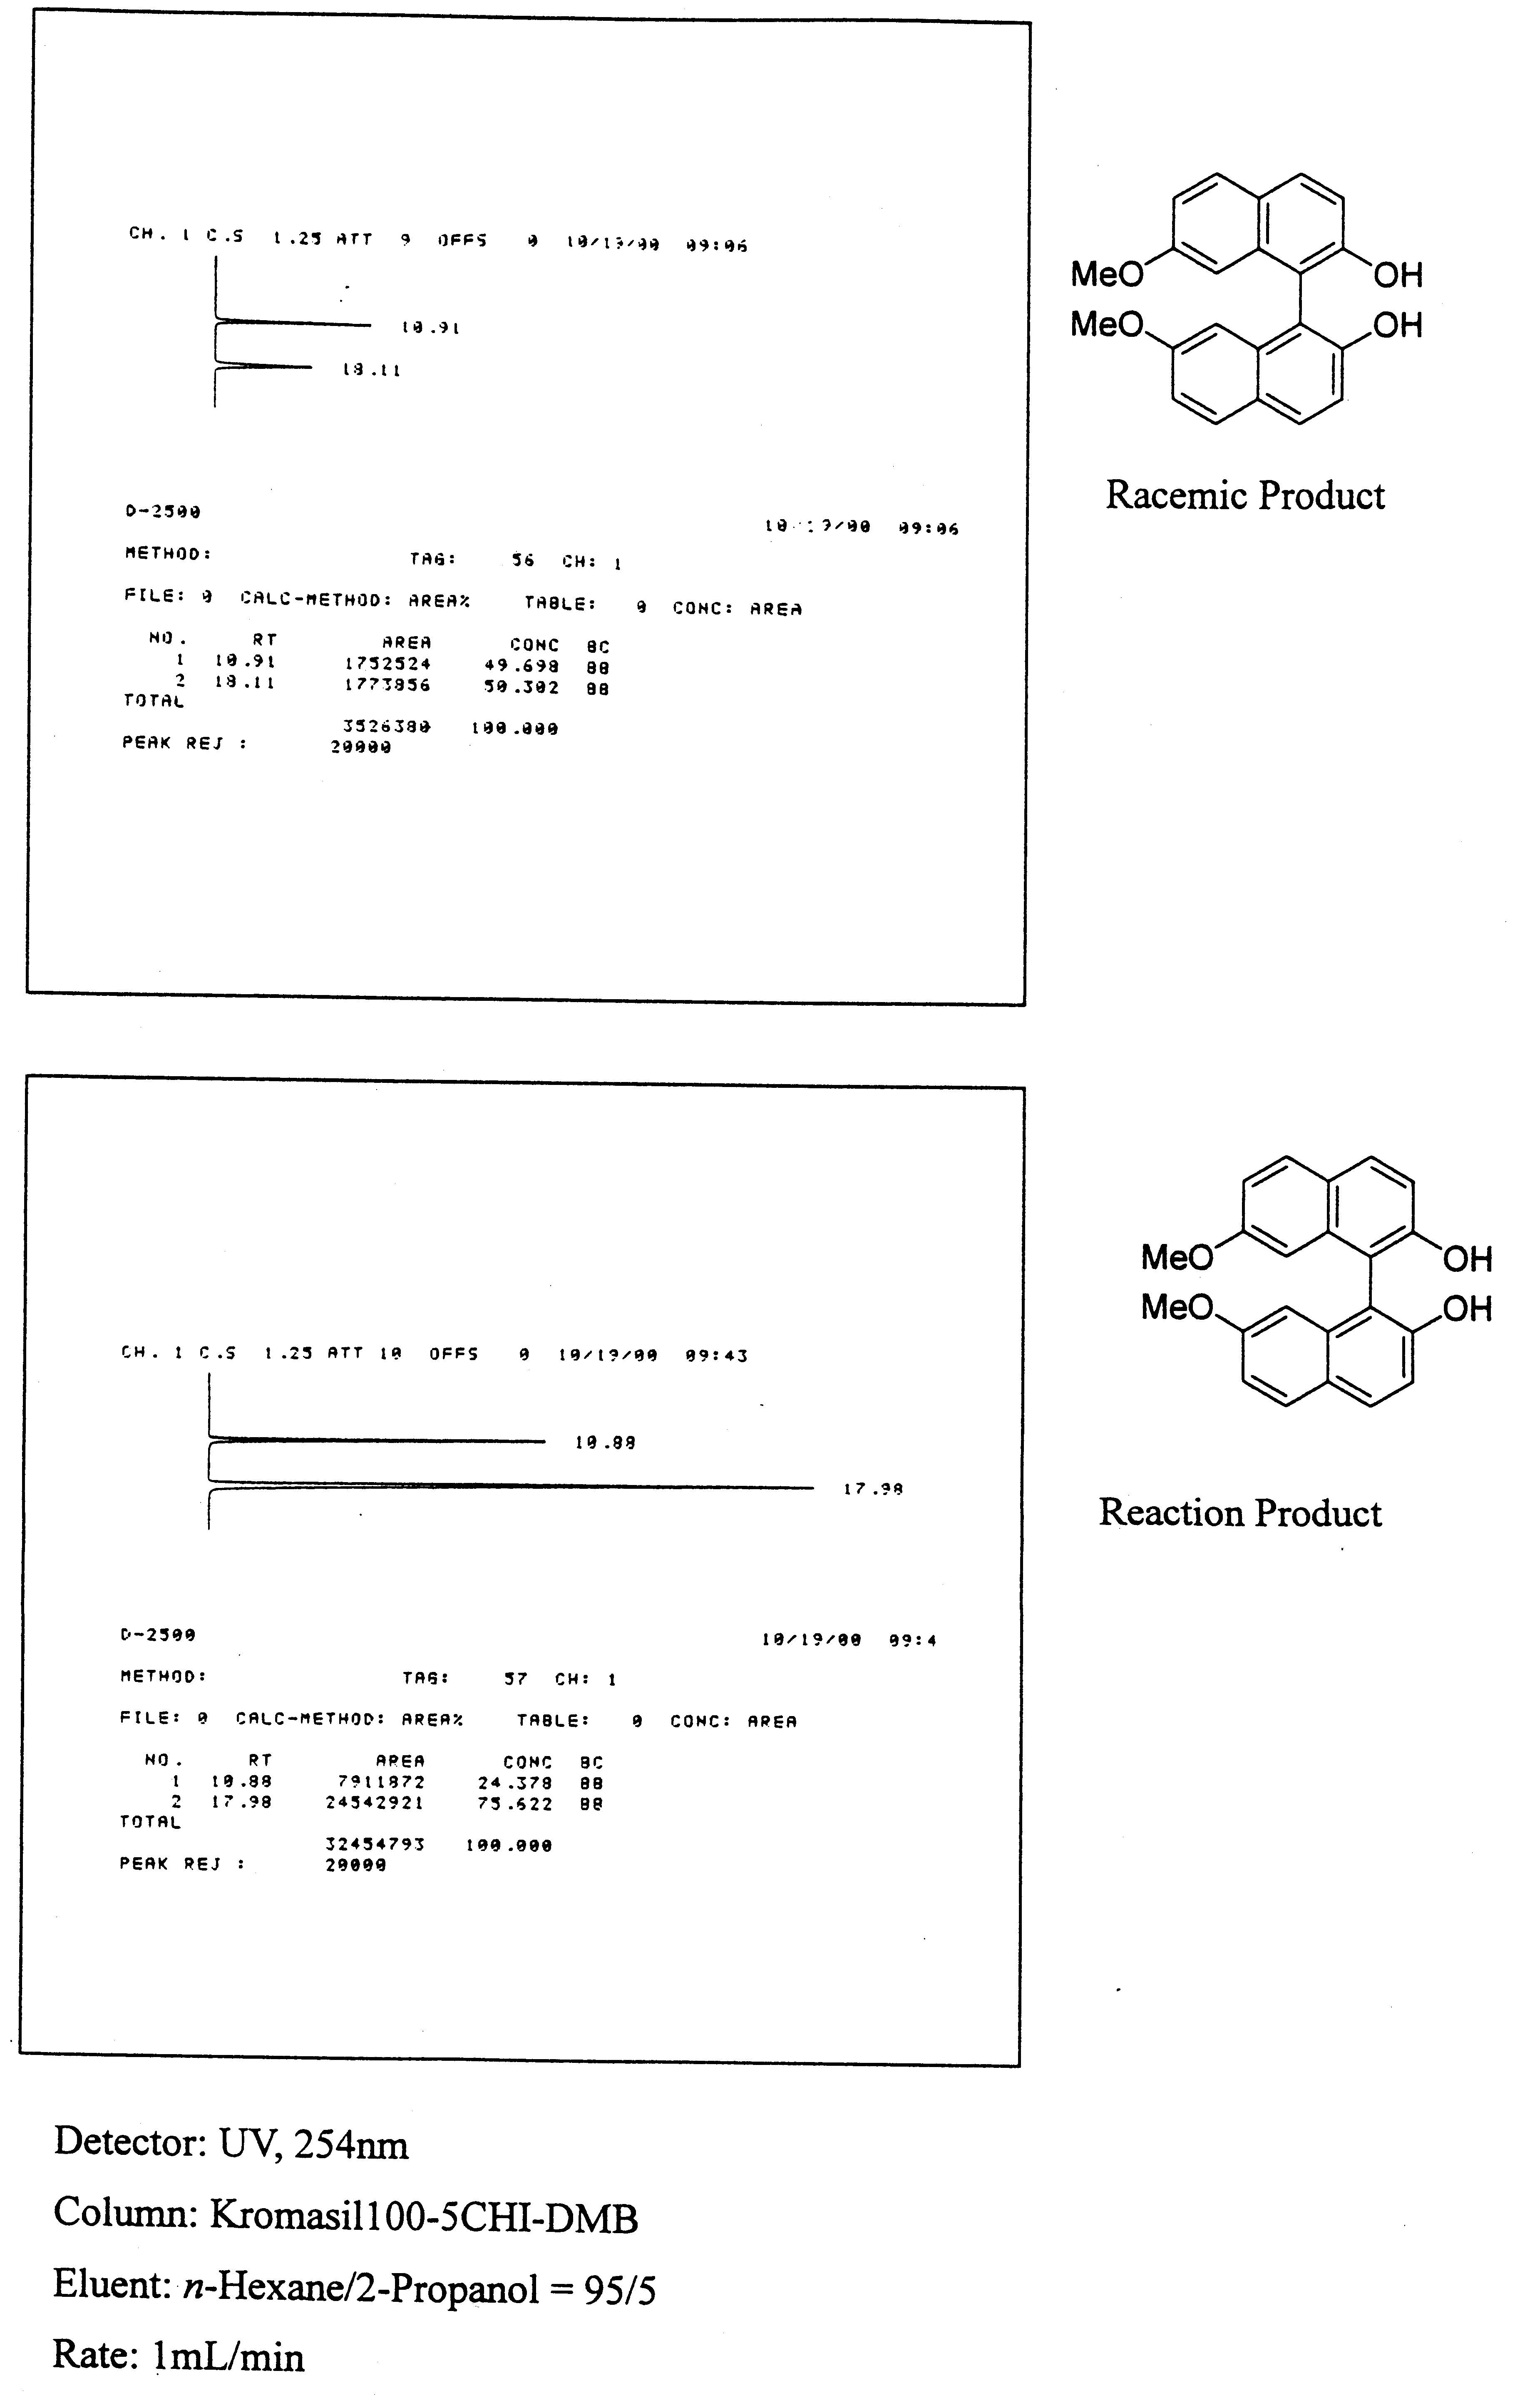


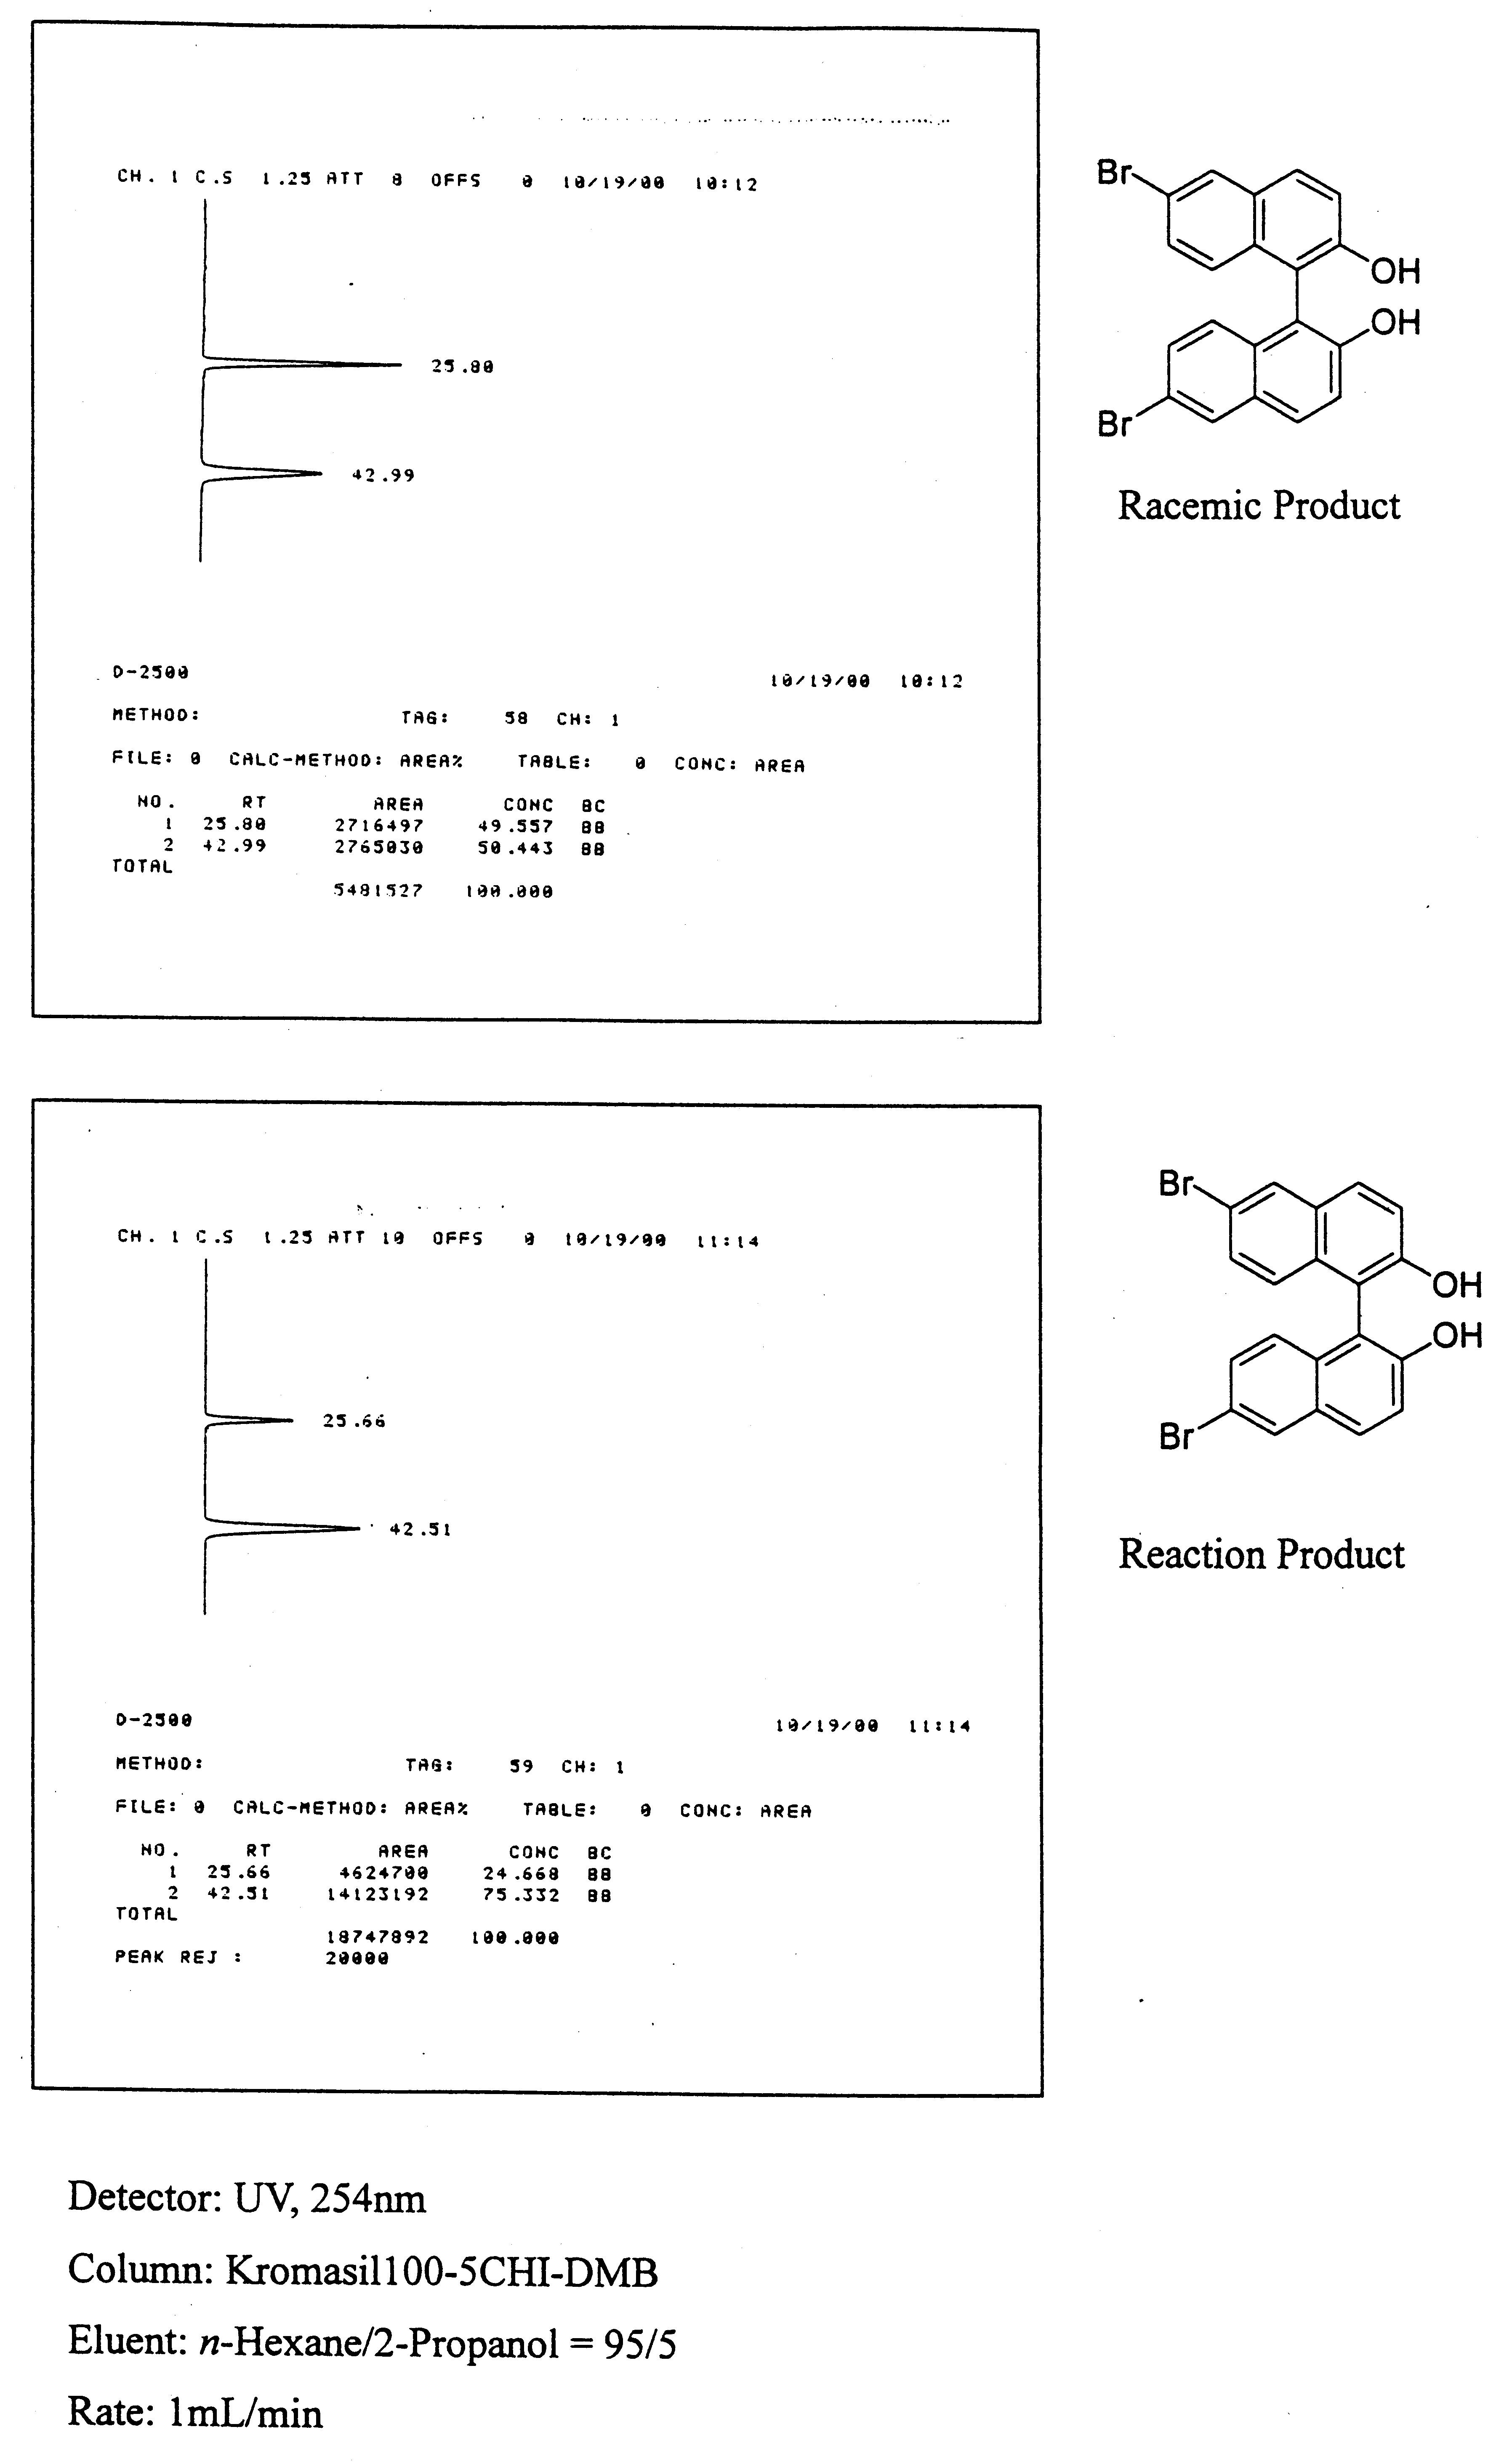

Supplement: b101670i.doc [file b101670i.doc]
